# Supplementary material
Source: publisher figshare collection journal article supplement (https://aacr.figshare.com/articles/dataset/_/23905298)

**Supplemental Figure 16. Methylation probe intensity across chromosome 1.** Heatmap representation of the beta value for all probes across chromosome 1, the probes are presented in a genomic coordinate sorted fashion. The recurrent regions of deletion, gain, templated insertion, and chromothripsis have been highlighted along with the cytoband information for reference.

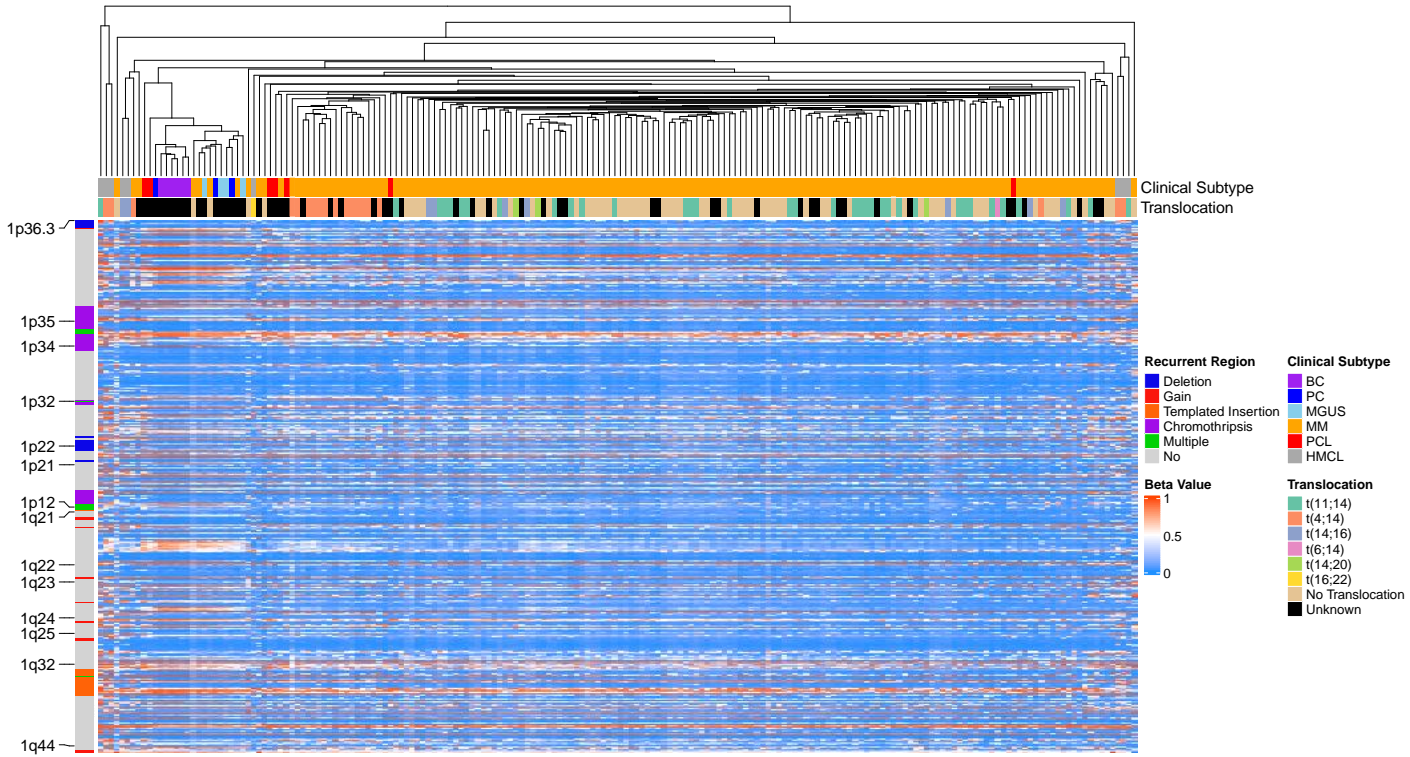

Supplement: Supplementary file 1 [file 41911481]
